# Supplementary material
Source: PubMed Central journal article supplement (PMC2141896)
Supplement: pnas_0709170104_1.pdf [file pnas_0709170104_1.pdf]

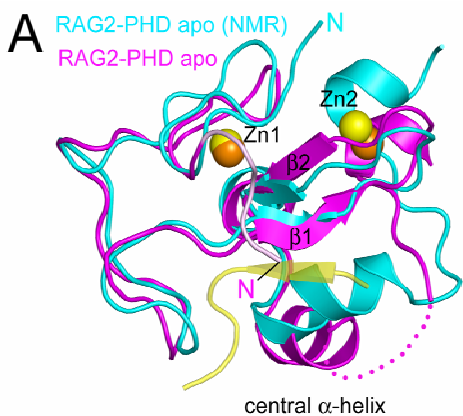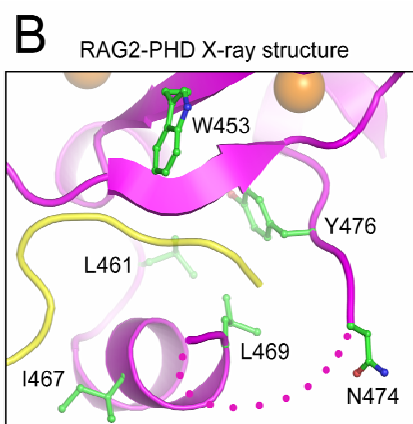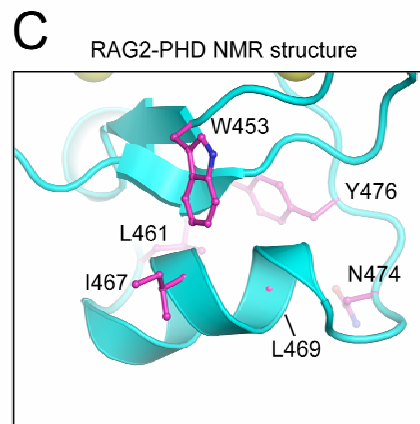

|                |                 | NMR distance constraints (Å) |             |          | Measured distances (Å) |             |
|----------------|-----------------|------------------------------|-------------|----------|------------------------|-------------|
| Atom 1         | Atom2           | d                            | d(minus)    | d(plus)  | NMR                    | X-ray       |
| L461 HD1       | Y476 HE1        | 6.22                         | 4.42        | 0        | 6.5                    | 7.9         |
| <b>I467 HB</b> | <b>W453 HE3</b> | <b>4.76</b>                  | <b>2.96</b> | <b>0</b> | <b>5.0</b>             | <b>14.8</b> |
| L469 HA        | N474 HB2        | 5.22                         | 3.42        | 0        | 4.3                    | 6.5         |
| L469 HA        | N474 HB1        | 5.22                         | 3.42        | 0        | 4.3                    | 8.2         |
| L469 HD2       | N474 HB2        | 5.75                         | 3.95        | 0        | 2.0                    | 6-7         |
| L469 HD1       | Y476 HD1        | 5.85                         | 4.05        | 0        | 5.0                    | 7.9         |
| L469 HD2       | Y476 HD1        | 5.38                         | 3.58        | 0        | 4.9                    | 7.3         |
