# Supplementary material
Source: PubMed Central journal article supplement (PMC2141896)
Supplement: pnas_0709170104_5.pdf [file pnas_0709170104_5.pdf]

**Table 2. Sequences of the H3 peptides used in crystallization and binding assays**

| Peptide sequence                                             | Crystallization | Fluorescence anisotropy | Tryptophan fluorescence |
|--------------------------------------------------------------|-----------------|-------------------------|-------------------------|
| ART <i>Kme2</i> QTARKSTGG <i>Kflu</i> Y*                     |                 | √                       |                         |
| ART <i>Kme3</i> QTARKSTGG <i>Kflu</i> Y*                     |                 | √                       |                         |
| A <i>Rme2a</i> T <i>Kme2</i> QTARKSTGG <i>Kflu</i> Y*        |                 | √                       |                         |
| A <i>Rme2a</i> T <i>Kme3</i> QTARKSTGG <i>Kflu</i> Y*        |                 | √                       |                         |
| A <i>Rme2s</i> T <i>Kme2</i> QTARKSTGG <i>Kflu</i> Y*        |                 | √                       |                         |
| A <i>Rme2s</i> T <i>Kme3</i> QTARKSTGG <i>Kflu</i> Y*        |                 | √                       |                         |
| ART <i>Kme3</i> QTARKSTGGKAPRKQ <i>Kbio</i> A                | √               |                         | √                       |
| A <i>Rme1</i> T <i>Kme3</i> QTARKSTGGKAPRKQ <i>Kbio</i> A    | √               |                         |                         |
| A <i>Rme2s</i> T <i>Kme2</i> QTARKSTGGKAPRKQ <i>Kbio</i> A*  | √               |                         |                         |
| A <i>Rme2s</i> T <i>Kme3</i> QTARKSTGGKAPRKQ <i>Kbio</i> A * | √               |                         | √                       |
| A <i>Rme2a</i> T <i>Kme3</i> QTARKSTGGKAY*                   | √               |                         |                         |

*Kflu*, lysine conjugated to fluorescein; *Kbio*, lysine conjugated to biotin. Concentrations of the fluorescein-labeled peptides were determined by absorption at 492 nm and pH 8.0 ( $\epsilon = 68,000$ ). Other peptide concentrations were determined by the dry weight and dissolved volume.

\*HPLC-purified.
