# Supplementary material
Source: PubMed Central journal article supplement (PMC2141896)
Supplement: pnas_0709170104_6.pdf [file pnas_0709170104_6.pdf]

**Table 3. Refinement statistics**

|                                                  | K4me3             | R2me1/K4me3      | R2me2a/K4me3        | R2me2s/K4me3      | R2me2s/K4me2     |
|--------------------------------------------------|-------------------|------------------|---------------------|-------------------|------------------|
| Space group                                      | $P2_1$            | $C2$             | $C222_1$            | $P2_1$            | $P2_1$           |
| Unit cell                                        |                   |                  |                     |                   |                  |
| $a, b, c, \text{Å}$                              | 54.8, 46.8, 57.0  | 76.7, 46.9, 57.0 | 62.9, 66.6, 87.5    | 40.4, 46.6, 57.0  | 36.2, 46.7, 56.9 |
| $\alpha, \beta, \gamma, ^\circ$                  | 90, 101.5, 90     | 90, 103.7, 90    | 90, 90, 90          | 90, 95.1, 90      | 90, 97.2, 90     |
| Resolution range, Å                              | 30–2.4 (2.49–2.4) | 30–2.0 (2.07–2)  | 30–2.05 (2.12–2.05) | 20–1.8 (1.86–1.8) | 30–2.0 (2.07–2)  |
| $R_{\text{merge}}^*$                             | 0.150 (0.487)     | 0.074 (0.180)    | 0.182 (0.516)       | 0.056 (0.206)     | 0.101 (0.359)    |
| Completeness, %                                  | 99.4 (95.7)       | 98.5 (89.6)      | 99.8 (99.9)         | 96.5 (87.9)       | 98.8 (92.7)      |
| $I/\sigma(I)$                                    | 8.1 (1.8)         | 18.9 (5.0)       | 9.9 (3.0)           | 25.5 (3.9)        | 16.0 (2.9)       |
| Unique reflections                               | 11,048            | 13,424           | 11,827              | 19,094            | 12,678           |
| Protein plus peptide atoms                       | 1,937             | 1,405            | 1,448               | 1,430             | 1,381            |
| Metal plus solvent atoms                         | 242               | 181              | 348                 | 241               | 256              |
| $R$ factor ( $R_{\text{free}}$ ), % <sup>†</sup> | 19.6 (23.0)       | 18.7 (19.7)      | 18.5 (20.9)         | 18.1 (20.8)       | 19.6 (23.2)      |
| Rmsd bond length, Å                              | 0.0071            | 0.01205          | 0.0063              | 0.0074            | 0.0152           |
| rmsd bond angle, °                               | 1.504             | 1.821            | 1.3259              | 1.8109            | 1.7993           |
| Average $B$ value (Wilson), Å <sup>2</sup>       | 30.5 (14.6)       | 19.9 (11.0)      | 18.5 (10.0)         | 27.2 (19.4)       | 24.7 (16.7)      |

Data of the highest-resolution shell are shown in parentheses.

\* $R_{\text{merge}} = \sum_h \sum_i |I_{hi} - \langle I_h \rangle| / \sum_i \langle I_h \rangle$ , where  $I_{hi}$  is the intensity of the  $i$ th observation of reflection  $h$  and  $\langle I_h \rangle$  is the average intensity of redundant measurements of the  $h$  reflections.

† $R$  factor =  $\sum |F_o| - |F_c| / \sum |F_o|$ , where  $F_o$  and  $F_c$  are the observed and calculated structure-factor amplitudes.  $R_{\text{free}}$  is monitored with 5% of the reflections excluded from refinement.
