# Supplementary material
Source: PubMed Central journal article supplement (PMC2141896)

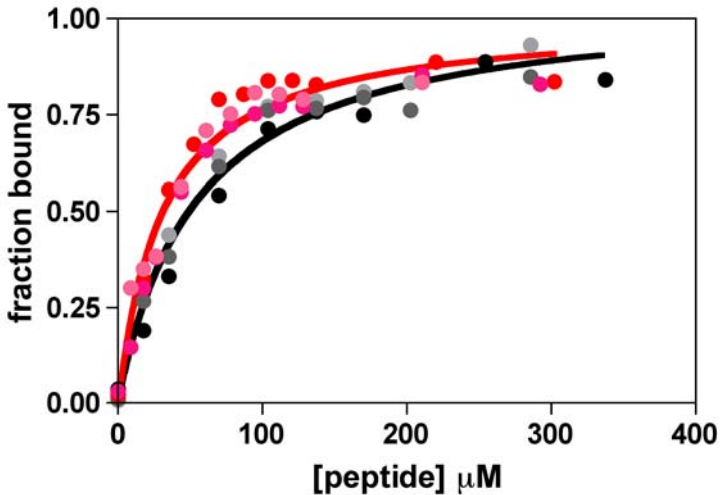

|                | <u>KD (<math>\mu\text{M}</math>)</u> |
|----------------|--------------------------------------|
| ● K4me3        | $54.4 \pm 7.3$                       |
| ● R2me2s/K4me3 | $31.0 \pm 3.6$                       |

Supplement: pnas_0709170104_2.pdf [file pnas_0709170104_2.pdf]

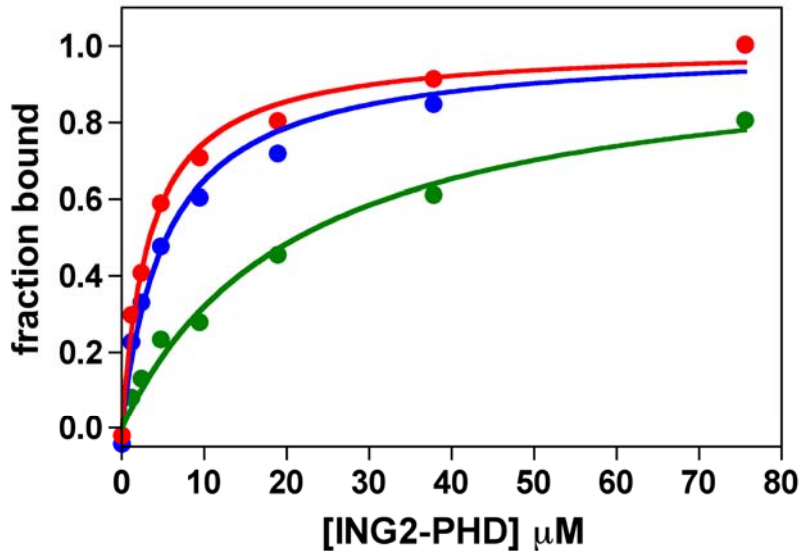

|                | <u>KD (<math>\mu\text{M}</math>)</u> |
|----------------|--------------------------------------|
| ● K4me3        | $3.4 \pm 0.5$                        |
| ● K4me2        | $5.4 \pm 1.3$                        |
| ● R2me2s/K4me3 | $21.2 \pm 6.6$                       |

Supplement: pnas_0709170104_3.pdf [file pnas_0709170104_3.pdf]

# RAG2-PHD (414-487)

MW  
standards

wt

Y445A

Y445D

Y445F

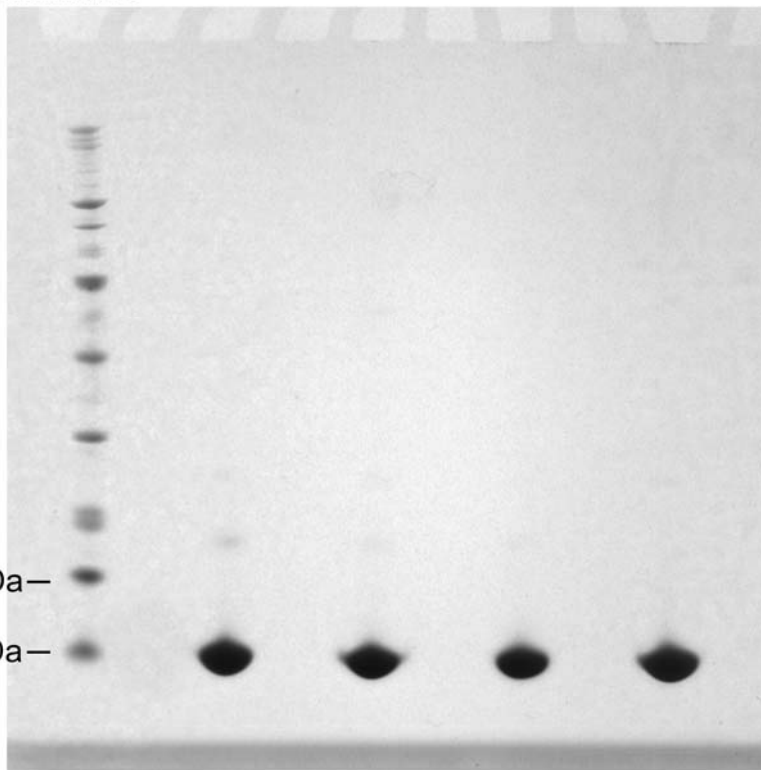

14.4 kDa—

6.5 kDa—

Supplement: pnas_0709170104_4.pdf [file pnas_0709170104_4.pdf]
